# Supplementary material for: Proanthocyanidins and Where to Find Them: A Meta-Analytic Approach to Investigate Their Chemistry, Biosynthesis, Distribution, and Effect on Human Health
Source: MDPI journal article supplement (doi:10.3390/antiox10081229), 2021-07-30
Supplement: s1 [file s1]

## Supplementary Materials

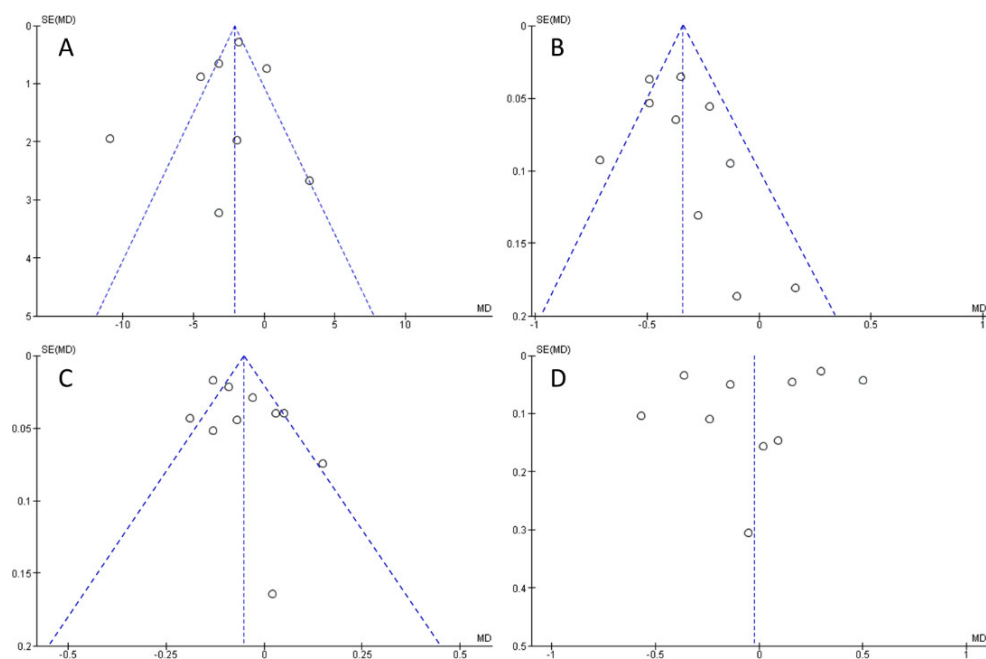

**Figure S1:** Funnel plot representation of the effects derived from the supplementation of PACs on hematic levels of sugar (A), cholesterol (B), HDL (C), and LDL (D). The x-axis shows the results for the selected studies plotted as the odds ratio. Each dot represents a single study. The figure was generated by Review Manager Software, version 5.4.1.
